# Supplementary material
Source: HighWire-hosted journal article supplement (http://www.ajnr.org/highwire/filestream/77199/field_highwire_adjunct_files/0/20-00397.pdf)
Supplement: 20-00397.pdf [file 20-00397.pdf]

**On-line Table: Summary of CPE and PFD values**

|                                       | No. | Mean    | 95% CI             | SD      | RSD      | Median | 95% CI             | Minimum | Maximum | 2.5–97.5 P         | Normal Distribution |
|---------------------------------------|-----|---------|--------------------|---------|----------|--------|--------------------|---------|---------|--------------------|---------------------|
| <b>Cohort of 100 patients</b>         |     |         |                    |         |          |        |                    |         |         |                    |                     |
| CPE                                   | 100 | 13.8    | 11.473–16.127      | 11.7284 | 0.8499   | 15     | 11.723–19.000      | 0       | 43      | .000–33.000        | <0.0001             |
| PFD                                   | 100 | -74.54  | -76.184 to -72.896 | 8.2858  | -0.1112  | -74    | -75.277 to -73.000 | -93     | -43     | -91.000 to -59.000 | 0.0121              |
| PFD                                   |     |         |                    |         |          |        |                    |         |         |                    |                     |
| Asymptomatic                          | 69  | -77.899 | -79.313 to -76.484 | 5.8865  | -0.07557 | -76    | -78.000 to -75.000 | -93     | -69     | -91.775 to -71.000 | 0.0121              |
| Symptomatic                           | 31  | -67.065 | -70.006 to -64.123 | 8.0205  | -0.1196  | -69    | -71.414 to -62.586 | -83     | -43     | -81.900 to -47.125 | 0.1378              |
| CPE                                   |     |         |                    |         |          |        |                    |         |         |                    |                     |
| Asymptomatic                          | 69  | 9.812   | 7.343–12.280       | 10.276  | 1.0473   | 10     | 0.000–13.000       | 0       | 31      | .000–31.000        | 0.0022              |
| Symptomatic                           | 31  | 22.677  | 19.073–26.282      | 9.8265  | 0.4333   | 22     | 21.000–27.414      | 0       | 43      | .000–41.075        | 0.0652              |
| <b>Cohort of 66 patients with CPE</b> |     |         |                    |         |          |        |                    |         |         |                    |                     |
| CPE                                   | 66  | 20.909  | 19.078–22.791      | 7.6535  | 0.366    | 21     | 19.000–22.000      | 6       | 43      | 6.450–35.550       | 0.4694              |
| PFD                                   | 66  | -72.03  | -74.043 to -70.017 | 8.1881  | -0.1137  | -73    | -74.000 to -72.000 | -91     | -43     | -88.850 to -58.150 | 0.0226              |
| PFD                                   |     |         |                    |         |          |        |                    |         |         |                    |                     |
| Asymptomatic                          | 38  | -76.553 | -78.308 to -74.797 | 5.3408  | -0.06977 | -74.5  | -78.000 to -73.000 | -91     | -69     | -.100 to -69.900   | 0.0158              |
| Symptomatic                           | 28  | -65.893 | -68.755 to -63.031 | 7.3804  | -0.112   | -63.5  | -71.000 to -62.000 | -77     | -43     | -77.000 to -46.000 | 0.0338              |
| CPE                                   |     |         |                    |         |          |        |                    |         |         |                    |                     |
| Asymptomatic                          | 38  | 17.816  | 15.548–20.084      | 6.9003  | 0.3873   | 16.5   | 13.000–20.000      | 6       | 31      | 6.000–31.000       | 0.4149              |
| Symptomatic                           | 28  | 25.107  | 22.534–27.680      | 6.6351  | 0.2643   | 23     | 21.358–28.642      | 14      | 43      | 14.200–41.600      | 0.1874              |

**Note:**—RSD indicates relative standard deviation.
